# Supplementary material for: The Development of the Framework of Effective Teaching-Learning in Clinical Education: A Meta-Synthesis Approach
Source: Hindawi journal article supplement (doi:10.1155/2022/4751931), 2022-01-28
Supplement: f1 [file 4751931.f1.zip]

Archive with 3 entries (3 files):
- 4751931.f1/supplementary material 1.docx
- 4751931.f1/supplementary material 2.docx
- 4751931.f1/supplementary material 3.docx
