# Supplementary material for: The Development of the Framework of Effective Teaching-Learning in Clinical Education: A Meta-Synthesis Approach
Source: Hindawi journal article supplement (doi:10.1155/2022/4751931), 2022-01-28
Supplement: f1 [file 4751931.f1.zip › 4751931.f1/supplementary material 1.docx]

**Supplemental 1. Keywords and search combinations**

| **Search combination** | **Keywords** |
| --- | --- |
| GC+GM | **Effective teaching in higher education: Qualitative Research** OR **Qualitative Methodology** OR **Qualitative Study** OR **Qualitative Approach**  Effective* AND Teaching* AND Higher* AND Education* AND Qualitative* AND Research*  "Effective Teaching AND Higher Education AND Qualitative Research"  **Effectiveness of teaching in higher education: Qualitative Research** OR **Qualitative Methodology** OR **Qualitative Study** OR **Qualitative Approach**  Effectiveness* AND Teaching* AND Higher* AND Education* AND Qualitative* AND Research*  "Effectiveness of Teaching AND Higher Education AND Qualitative Research" |
| GC+SM | **Effective teaching in higher education: Grounded Theory** OR **Ethnography** OR **Phenomenology** OR **Thematic Analysis** OR **Content Analysis** OR **Delphi method** OR **Focus Groups** OR **Discourse analysis**  Effective* AND Teaching* AND Higher* AND Education* AND Grounded* AND Theory*  "Effective Teaching AND Higher Education AND Grounded AND Theory"  **Effectiveness of teaching in higher education: Grounded Theory** OR **Ethnography** OR **Phenomenology** OR **Thematic Analysis** OR **Content Analysis** OR **Delphi method** OR **Focus Groups** OR **Discourse analysis**  Effectiveness* AND Teaching* AND Higher* AND Education* AND Grounded* AND Theory*  "Effectiveness of Teaching AND Higher Education AND Grounded Theory" |
| SC+GM | **Effective teaching in medical education: Qualitative research** OR **Qualitative Methodology** OR **Qualitative Study** OR **Qualitative Approach**  Effective* AND Teaching* AND Medical* AND Education* AND Qualitative* AND Research*  "Effective Teaching AND Medical Education AND Qualitative Research"  **Effective teaching in clinical education: Qualitative research** OR **Qualitative Methodology** OR **Qualitative Study** OR **Qualitative Approach**  Effective* AND Teaching* AND Clinical* AND Education* AND Qualitative* AND Research*  "Effective Teaching AND Clinical Education AND Qualitative Research"  **learning in clinical environment: Qualitative research** OR **Qualitative Methodology** OR **Qualitative Study** OR **Qualitative Approach**  Learning* AND Clinical* AND environment* AND Qualitative* AND Research*  "Learning AND Clinical Environment AND Qualitative Research"  **learning in clinical setting: Qualitative research** OR **Qualitative Methodology** OR **Qualitative Study** OR **Qualitative Approach**  Learning* AND Clinical* AND Setting* AND Qualitative* AND Research*  "Learning AND Clinical Setting AND Qualitative Research"  **Teaching-Learning Factors in clinical education: Qualitative research** OR **Qualitative Methodology** OR **Qualitative Study** OR **Qualitative Approach**  Teaching-Learning* AND Factors* AND Clinical* AND Education* AND Qualitative* AND Research*  "Teaching-Learning Factors AND Clinical Education AND Qualitative Research"  **Effective clinical teaching: Qualitative research** OR **Qualitative Methodology** OR **Qualitative Study** OR **Qualitative Approach**  Effective* AND clinical* AND teaching* AND Qualitative* AND Research*  "Effective AND Clinical Teaching AND Qualitative Research"  **effectiveness of clinical teaching: Qualitative research** OR **Qualitative Methodology** OR **Qualitative Study** OR **Qualitative Approach**  effectiveness* AND Clinical* AND teaching* AND Qualitative* AND Research*  "effectiveness AND Clinical teaching AND Qualitative Research"  **Effective Clinical Teaching Behaviors: Qualitative research** OR **Qualitative Methodology** OR **Qualitative Study** OR **Qualitative Approach**  Effective* AND clinical* AND teaching* AND Behaviors* AND Qualitative* AND Research*  "Effective AND Clinical Teaching Behaviors AND Qualitative Research" |
| SC+SM | **Effective teaching in medical education: Grounded Theory** OR **Ethnography** OR **Phenomenology** OR **Thematic Analysis** OR **Content Analysis** OR **Delphi method** OR **Focus Groups** OR **Discourse analysis**  Effective* AND Teaching* AND Medical* AND Education* AND Grounded* AND Theory*  "Effective Teaching AND Medical Education AND Grounded Theory"  **Effective teaching in clinical education: Grounded Theory** OR **Ethnography** OR **Phenomenology** OR **Thematic Analysis** OR **Content Analysis** OR **Delphi method** OR **Focus Groups** OR **Discourse analysis**  Effective* AND Teaching* AND Clinical* AND Education* AND Grounded* AND Theory*  "Effective Teaching AND Clinical Education AND Grounded Theory"  **learning in clinical environment: Grounded Theory** OR **Ethnography** OR **Phenomenology** OR **Thematic Analysis** OR **Content Analysis** OR **Delphi method** OR **Focus Groups** OR **Discourse analysis**  Learning* AND Clinical* AND environment* AND Grounded* AND Theory*  "Learning AND Clinical Environment AND Grounded Theory"  **learning in clinical setting: Grounded Theory** OR **Ethnography** OR **Phenomenology** OR **Thematic Analysis** OR **Content Analysis** OR **Delphi method** OR **Focus Groups** OR **Discourse analysis**  Learning* AND Clinical* AND Setting* AND Grounded* AND Theory*  "Learning AND Clinical Setting AND Grounded Theory"  **Teaching-Learning Factors in clinical education: Grounded Theory** OR **Ethnography** OR **Phenomenology** OR **Thematic Analysis** OR **Content Analysis** OR **Delphi method** OR **Focus Groups** OR **Discourse analysis**  Teaching-Learning* AND Factors* AND Clinical* AND Education* AND Grounded* AND Theory*  "Teaching-Learning Factors AND Clinical Education AND Grounded Theory"  **Effective clinical teaching: Grounded Theory** OR **Ethnography** OR **Phenomenology** OR **Thematic Analysis** OR **Content Analysis** OR **Delphi method** OR **Focus Groups** OR **Discourse analysis**  Effective* AND clinical* AND teaching* AND Grounded* AND Theory*  "Effective AND Clinical Teaching AND Grounded Theory"  **effectiveness of clinical teaching: Grounded Theory** OR **Ethnography** OR **Phenomenology** OR **Thematic Analysis** OR **Content Analysis** OR **Delphi method** OR **Focus Groups** OR **Discourse analysis**  effectiveness* AND Clinical* AND teaching* AND Grounded* AND Theory*  "effectiveness AND Clinical teaching AND Grounded Theory"  **Effective Clinical Teaching Behaviors: Grounded Theory** OR **Ethnography** OR **Phenomenology** OR **Thematic Analysis** OR **Content Analysis** OR **Delphi method** OR **Focus Groups** OR **Discourse analysis**  Effective* AND clinical* AND teaching* AND Behaviors* AND Grounded* AND Theory*  "Effective AND Clinical Teaching Behaviors AND Grounded Theory" |
