# Supplementary material for: The Development of the Framework of Effective Teaching-Learning in Clinical Education: A Meta-Synthesis Approach
Source: Hindawi journal article supplement (doi:10.1155/2022/4751931), 2022-01-28
Supplement: f1 [file 4751931.f1.zip › 4751931.f1/supplementary material 2.docx]

**Supplemental 2. Extracting, grouping and summarizing the required data from selected studies and articles**

| **purpose of the research (focus of the study)** | **Participants** | | **Methodology** | | **Discipline/ research context** | **Language** | **Country** | **Author/s (Publish year)** | **N** |
| --- | --- | --- | --- | --- | --- | --- | --- | --- | --- |
| **Type** | **Number** | **Data collection methods and techniques** | **Qualitative approach** |
| Description and evaluation the (effective) teaching behaviors and skills | Tutors (registrars and full-time consultants) | 24 | Observation | Discourse analysis | Undergraduate clinical medicine / bedside clinical teaching | English | Australia | Price & Mitchell [1] (1993) | 1 |
| Exploring students' perceptions about effective clinical learning experiences | Undergraduate students | 19 | Focus groups | Thematic analysis | Department of Surgery, Vrije Universiteit Medical Centre, Amsterdam/ Fifth year undergraduate students | English | Netherlands | Van Der Hem-Stokroos et al [2] (2003) | 2 |
| Explaining the nature of the relationship between preceptor and trainee as a critical component of teaching | Family physician preceptors | 14 | Interviews | Constructivist Grounded Theory (CGT) | Family medicine/ The undergraduate medical program (clinical clerkship) at the University of British Columbia | English | Canada | Cuncic et al [3] (2018) | 3 |
| Feedback in the undergraduate clinical teaching environment as an effective factor in students learning | Tutors (clinical teachers) | 12 | Semi-structured interviews | Thematic analysis | Dentistry/ undergraduate courses at the Faculty of Dentistry, University of Otago | English | New Zealand | Adam et al [4] (2019) | 4 |
| Explore the teaching behaviors in nurse education (teaching  Effectiveness) | Nurse educators | 10 | Observation | qualitative content analysis | Nursing/ clinical teaching behaviors in the medical–surgical unit at a hospital in Taiwan | English | Taiwan | Hsu [5] (2006) | 5 |
| Exploring the feasibility of integrated skills teaching and its value and impact on students' clinical learning | Undergraduate students | 51 | Observation and semi-structured interviews | Thematic analysis | Undergraduate clinical medicine/ St Mary’s Hospital campus of the Imperial College, London | English | UK | Kneebone et al [6] (2002) | 6 |
| Investigating the value of using medical students' criteria to assessing effective teaching skills | Undergraduate students | 193 | Literature search, discussions, think-aloud and cognitive interviews | Thematic analysis | Undergraduate clinical medicine/ Fourth-year medical students at the University of Iowa Carver College of Medicine | English | USA | Pettit et al [7] (2015) | 7 |
| Identifying the factors that in teaching lead to improving clinical experiences and achieving clinical learning goals | Nursing students | 14 | Semi-structured interviews | Phenomenology | Nursing/ undergraduate students of the School of Nursing, Cleveland State University | English | USA | Niederriter, Eyth & Thoman [8] (2017) | 8 |
| Describing student nurses’ perceptions of clinical learning experiences (importance of clinical learning experiences and good and bad learning experiences) | Nursing undergraduate students (second, third and fourth year) | 16 | unstructured interviews | Phenomenology | Health and social care and medical and dental/ a joint research venture undertaken by the School of Health and Social Care of Jyvaskyla in Finland and the Chung Sang Medical and Dental College in Taiwan | English | Finland and Taiwan | Papp, Markkanen & Bonsdorff [9] (2002) | 9 |
| Exploring the effect of preceptorship on educational and pedagogical methods (Students' perception and learning in clinical practice: what shapes effective teaching-learning in undergraduate clinical practice?) | 13 nursing students and 13 preceptors | 26 | Document analysis and semi-structured interviews | Thematic analysis (interpretive approach) | Nursing/ Clinical environment of a hospital in Ireland | English | Ireland | McSharry & Lathlean [10] (2017) | 10 |
| Describe and explain the experiences of nursing faculty members and nursing managers about the factors that affect clinical education effectiveness | Faculty members, clinical instructors and nursing managers (head nurses and educational supervisors) | 18 | Individual semi-structured interviews and field notes | Conventional qualitative content analysis | Nursing / Isfahan University of Medical Sciences | Persian | Iran | Abazari & Namnabati [11] (2017) | 11 |
| Determinants of Effective clinical learning: A students and clinical teachers perspective | 24 undergraduate medical students and 5 clinical teachers | 29 | Focus groups | Framework Analysis Approach | Undergraduate clinical medicine/ College of Medicine at King Abdul-Aziz Bin Saud University for Health Sciences (KASU-HS) | English | Saudi Arabia | AlHaqwi et al [12] (2010) | 12 |
| The effectiveness of clinical teaching according to the traits of clinical instructors (perceptions of juniors and seniors students and clinical instructors of the characteristics of effective and ineffective teaching) | 46 students (24 juniors and 22 seniors) and 9 instructors | 55 | Triangulated method such as open-ended electronic survey, one-on-one interviews, critical incident technique and focus groups | Grounded theory | Dental hygiene education/ clinical environment of dental hygiene education, the University of New Mexico | English | USA | Pizanis & Pizanis [13] (2019) | 13 |
| Obtain in-depth qualitative insights into student and graduate perspectives of effective and ineffective learning experiences during their postgraduate dental education | Final-year DClinDent students and graduates of the DClinDent programme | 29 | Critical incident technique/ semi-structured individual interviews by telephone or Skype | Thematic analysis | Dental education/ DClinDent programme at the University of Otago | English | New Zealand | Subramanian et al [14] (2012) | 14 |
| Eliciting a complete picture of the effectiveness of clinical teaching by identifying the attributes of an effective clinical teacher | 3rd and 4th year dental students | 157 | Open-ended electronic survey | Thematic analysis | Dentistry/ New York University College of Dentistry | English | USA | Jahangiri et al [15] (2012) | 15 |
| Exploring effective teaching methods and behaviors in the emergency medicine department from the perspective of nursing students | Nursing students | 16 students (individual interview with 9 people and a focus group of 7 people) | Semi-structured interviews and focus groups | Phenomenology | Emergency medicine/ Nursing undergraduate students | English | People's Republic of China | Jiang et al [16] (2018) | 16 |
| Describing effective teaching behaviors of rural family medicine preceptors | Family medicine preceptors and fourth-year medical students | 33 (12 students and 21 preceptors) | Observation and standardized semi-structured telephone interviews | Descriptive qualitative study using the critical incident technique | Family medicine/ clinical clerkship in the rural family medicine/ The Department of Family Medicine of the University of Manitoba | English | Canada | Goertzen, Stewart & Weston [17] (1995) | 17 |
| Factors influencing the quality of student learning on practice placements (identify and explore students' clinical placement experiences with a focus on facilitating their learning) | Rehabilitation students | 17 students (Fourteen female and three male) | Individual semi-structured interviews | Longitudinal study using a phenomenography approach | Physiotherapy/ School of Health Professions and Rehabilitation Sciences, University of Southampton | English | UK | Morris [18] (2007) | 18 |
| Studying and explaining the real experiences of nursing students from effective clinical education | Second-, third- and fourth-year nursing students | 12 | In-depth interviews | Phenomenology | Nursing / Isfahan University of Medical Sciences | Persian | Iran | Alavi & Abedi [19] (2006) | 19 |
| How do residents perceive their teaching role in the clinical environment? (The importance of residents' proficiency and skill in teaching for effective teaching) | Residents | 18 (10 residents from the department of paediatrics and 8 from the department of obstetrics and gynaecology) | Semi-structured interviews | Thematic analysis | Paediatrics and obstetrics and gynaecology, the teaching hospital of the University of Maastricht, | English | Netherlands | Busari et al [20] (2002) | 20 |
| Use and reflection on the failure to improve teaching and increase student learning | Physicians/ clinical instructors | 20 (including fourteen from academic settings, two from the military medicine and four from community-based settings) | Open-ended questionnaire and interview | Qualitative content analysis and grounded theory | Undergraduate clinical medicine/ School of Medicine from Washington University | English | USA | Pinsky & Irby [21] (1997) | 21 |
| Exploring nursing students' perspectives on the effectiveness of clinical preceptors to improve students' clinical learning outcomes | Third- and fourth-year nursing students | 48 | Semi-structured interviews | Qualitative content analysis | Nursing/ Department of Nursing and Midwifery, Mzuzu | English | Malawi | Phuma-Ngaiyaye, Bvumbwe & Chipeta [22] (2017) | 22 |
| The role of nurses in maximizing the learning of medical students (maximizing effective teaching by practice nurses) | Six supervisors, eight nurses and thirteen medical students | 27 | Mixed professional focus groups | Thematic analysis | Undergraduate clinical medicine/ general practice clerkship in General Medicine at Glasgow University | English | UK | Smith, Cotton & O'Neill [23] (2009) | 23 |
| Exploring medical teachers’ everyday concerns about their teaching role and environment order to increase the quality of teaching (explore the culture of the teaching- learning in the clinical context) | Twenty-two doctors and nineteen students | 41 | Triangulated method such as semi-structured interviews, in-depth interviews, observation and informal discussions | Longitudinal ethnography | Undergraduate clinical medicine/ clinical teaching context | English | UK | Seabrook [24] (2003) | 24 |
| Describing the expectations of Bachelor of Science nursing students regarding what constitutes an effective clinical education | Nursing students in sophomore, junior and senior years | 17 | In- depth and semi-structured interviews on a face-to-face and individual | Qualitative content analysis | Nursing/ training units of hospitals affiliated with Tehran University of Medical Sciences | English | Iran | Esmaeili et al [25] (2014) | 25 |
| Understanding of the students’ experience of learning in a DEU using a communities of practice framework (increasing students' learning in the clinical settings) | Second- and Third -year nursing students | 25 | Focus groups | Exploratory qualitative study/ thematic analysis | Nursing/ clinical setting of the Dedicated Education Unit, School of Health Sciences, University of Canberra | English | Australia | Ranse & Grealish [26] (2007) | 26 |
| Enhancing clinical teaching through peer review | Faculty members who teach in  clinical settings | 10 | Observation and semi-structured interviews | Grounded theory | Undergraduate clinical medicine/ clinical setting of a hospital affiliated with Indiana University School of Medicine | English | USA | Gusic, Hageman & Zenni [27] (2013) | 27 |
| Physicians' reflection of their learning experiences to describe effective and ineffective teaching (clinical teachers' perceptions of clinical teaching in the context of change) | Clinicians | 15 | Individual semi-structured and in-depth interviews | Qualitative approach using a inductive content analysis | Undergraduate clinical medicine/ clinical setting of three hospital in the UK | English | UK | Knight & Bligh [28] (2006) | 28 |
| Describing students' experiences of collaborative learning in the clinical setting: proposing a holistic clinical education theory in order to achieving clinical learning objectives | Students | 64 (including 32 student nurse dyads, eight clinical groups) | Semi-structured interviews and reflective surveys | Grounded theory | Nursing/ clinical setting | English | USA | Ruth-Sahd [29] (2011) | 29 |
| Exploring resident physicians’ perspectives on effective outpatient teaching | First to third-year internal medicine residents | 11 | Semi-structured interviews and focus groups | Phenomenology | Internal medicine/ Mayo Clinic College of Medicine and Science (MCCMS) | English | USA | Kisiel, Bundrick & Beckman [30] (2009) | 30 |
| Describing the patterns of strengths and weaknesses of faculty teaching performance according to the evaluation form completed by students | Undergraduate and graduate nursing students | 317 | Faculty members and instructors evaluation form | Descriptive, retrospective, qualitative design (Thematic analysis) | Nursing/ School of Nursing, La Salle University, Philadelphia, Pennsylvania | English | USA | Wolf et al [31] (2004) | 31 |
| Student views on the effective teaching of physical examination skills (Students' Perspectives on Effective Teaching Skills for teachers) | Students from Years 1–3 undergraduate medicine | 30 | Focus groups | Qualitative content analysis | Undergraduate clinical medicine/ longitudinal skills training programme at the Maastricht University, Netherlands | English | Netherlands | Martens et al [32] (2009) | 32 |
| Exploring students’ Perceptions on effective teaching behaviors in dentistry and Dental and Dental Hygiene Education (defining effective teaching in both the classroom and clinic for dentistry and dental hygiene students) | Dental and dental hygiene undergraduate students | 175 (including 50 dental hygiene and 125 dentistry) | Open-ended questionnaire (qualitative survey) | Qualitative content analysis | Dental and Dental Hygiene Education/ undergraduate in the Faculty of Dentistry and School of Dental Hygiene, University of Manitoba | English | Canada | Schönwetter et al [33] (2006) | 33 |
| Explaining perception of nursing students from effective teaching in nursing education | Third year and senior nursing student | 11 | Focus groups | Qualitative content analysis | Nursing education/ Fasa University of Medical Sciences | Persian | Iran | Najafi kolyaee et al [34] (2011) | 34 |
| Describing the perceptions of medical students and clinical teachers of effective and high quality teaching-learning in the clinical setting. | Undergraduate medical students (fourth year) and clinical teachers | 10 | Focus groups and semi-structured interviews | Narrative analysis | Undergraduate clinical medicine/ The School of Medicine, University of Leeds and the Leeds Teaching Hospitals | English | UK | Stark [35] (2003) | 35 |
| Teaching Excellence: What Great Teachers Teach Us (Describing the Excellence of Teaching from a Nurse educators Perspective) | Nurse educators | 17 | Open-ended questionnaire (web-based qualitative survey) | Grounded theory | Nursing education/ Marquette University College of Nursing, Milwaukee, Wisconsin | English | USA | Johnson-Farmer & Frenn[36] (2009) | 36 |
| exploring of internal medicine residents’ perceptions on effective teaching strategies in the inpatient setting (evaluate residents’ perceptions of their role as teacher and team leader during residency in order to help identify strategies for improving a resident’s teaching effectiveness) | Internal medicine residents | 22 | Focus groups and open-ended interviews | Qualitative content analysis | Internal medicine/ Internal ward of a hospital from the School of Medicine of Emory University | English | USA | Smith & Kohlwes [37] (2011) | 37 |
| Description of teaching techniques and behaviors in Inpatient General Medicine Teaching that facilitate high quality learning (Description of effective clinical teaching techniques and behaviors) | Exemplary clinician educators and students | 58 (including 12 educators and 46 students) | Triangulated method such as in-depth and semi-structured interviews, focus groups and direct observation | Thematic analysis | Undergraduate clinical medicine/ Inpatient general medicine wards in 11 US hospitals affiliated with the University of Michigan School of Medicine | English | USA | Houchens et al [38] (2017) | 38 |
| Eliciting student nurses’ perceptions of the impact of mentorship on strengthening and increasing students' clinical learning | Nursing undergraduate students (third year) | 29 | Interviews and focus groups | Qualitative content analysis | Nursing/ School of Nursing is one of the UK universities | English | UK | Kilcullen [39] (2007) | 39 |
| Deep understanding the students’ and graduates’ insight of the Clinical Dentistry programme (DClinDent) regarding the characteristics of an effective and ineffective clinical learning environment | Final year students and graduates of the DClinDent programme | 20 (including 16 final year Doctor of Clinical Dentistry students and 4 dental specialists or graduates of the DClinDent programme) | Individual semi-structured and in-depth interviews and critical incident technique | Inductive content analysis | Dental education/ DClinDent programme at the University of Otago | English | New Zealand | Subramanian & Thomson [40] (2017) | 40 |
| Exploring nursing students' experiences related to clinical learning environments and factors effecting on the support and improvement of their clinical learning process | Nursing undergraduate students (second year) | 14 | In-depth interviews | Qualitative content analysis | Nursing/ Nursing Department of a Health Science Faculty in western Turkey | English | Turkey | Arkan, Ordin & Yılmaz [41] (2018) | 41 |
| Explaining the nursing students’ perceptions and experiences regarding features of effective education (both theoretical and clinical) | Undergraduate and graduate nursing students | 26 | Individual semi-structured interviews and focus groups | Conventional qualitative content analysis | Nursing/ Jondishapoor University of Medical Sciences, Ahvaz | Persian | Iran | Elahi, Alhani and Ahmadi [42] (2012) | 42 |
| Excellence in Teaching: the best teaching practice, in support of an appropriate framework for the development of teaching competencies to health-science educators | First-year Oral Hygiene and educators | 25 (including 15 students and 10 educators) | Semi-structured interviews and Open-ended questionnaire | Qualitative approach (case study) | Dentistry: Oral Hygiene department University of the Western Cape at the South African | English | South Africa | McMillan [43] (2007) | 43 |
| Gaining insight into the learners’ lived experiences of teaching and learning at the clinical general practice (the learner’s perspective on learning facilitation factors in the clinical general practice) | Medical students, junior hospital doctors, GP registrars and GP teachers | 52 | Individual semi-structured and in-depth interviews | Phenomenology | Undergraduate clinical medicine/ Academic Unit of General Practice, Medical School, Australian National University | English | Australia | Thomson et al [44] (2014) | 44 |
| The teaching behaviors that creates effective learning in the emergency department units | Faculty members | 33 | Structured telephone survey (telephone-based qualitative survey) | Grounded theory | Emergency medicine/ teaching in the emergency departments of Michael Hospital, University of Toronto, Canada | English | Canada | Bandiera, Lee & Tiberius [45] (2005) | 45 |
