# Supplementary material for: The Development of the Framework of Effective Teaching-Learning in Clinical Education: A Meta-Synthesis Approach
Source: Hindawi journal article supplement (doi:10.1155/2022/4751931), 2022-01-28
Supplement: f1 [file 4751931.f1.zip › 4751931.f1/supplementary material 3.docx]

**Supplemental 3. Coding and analytical themes resulting from the analysis and synthesis of qualitative studies**

| **Dimensions** | **Category (Factors)** | **Subcategories** | **References** |
| --- | --- | --- | --- |
| **Behavioral or content** | Learner/ student | - Active learner engagement and tendency to intellectual challenge | Price & Mitchell [1] (1993); van der Hem-Stokroos et al [2] (2003); Kneebone et al [6] (2002); Goertzen, Stewart & Weston [17] (1995); Smith, Cotton & O'Neill [23] (2009); Ranse & Grealish [26] (2007); Smith & Kohlwes [37] (2011); Subramanian & Thomson [40] (2017); Bandiera, Lee & Tiberius [45] (2005); Morris [18] (2007) |
| - Independence, autonomy and self-direction | Papp, Markkanen & Bonsdorff [9] (2002); Subramanian et al [14] (2012); Goertzen, Stewart & Weston [17] (1995); Kisiel, Bundrick & Beckman [30] (2009); Wolf et al [31] (2004); Bandiera, Lee & Tiberius [45] (2005) |
| - Learners' perceptions and attitude about clinical learning | Arkan, Ordin & Yılmaz [41] (2018) |
| - Role transparency and responsibility | Abazari & Namnabati [11] (2017); Ranse & Grealish [26] (2007) |
| - Preparation, previous knowledge and experience | Alavi & Abedi [19] (2006); Najafi kolyaee et al [34] (2011); Arkan, Ordin & Yılmaz [41] (2018) |
| - Learning skills and styles | AlHaqwi et al [12] (2010); Smith, Cotton & O'Neill [23] (2009); Thomson et al [44] (2014) |
| - Positive personality characteristics of the learner (motivation, self-confidence, criticism, enthusiasm, communication skills and friendly relations, love and interest in learning) | Ruth-Sahd [29] (2011); Pizanis & Pizanis [13] (2019); Wolf et al [31] (2004); Schönwetter et al [33] (2006); McMillan [43] (2007); Thomson et al [44] (2014); Alavi & Abedi [19] (2006) |

**Supplemental 3. Continued**

| **Dimensions** | **Category (Factors)** | **Subcategories** | **References** |
| --- | --- | --- | --- |
| **Behavioral or content** | Teacher/ educator | - Teaching skills and styles | Price & Mitchell [1] (1993); Kneebone et al [6] (2002); Pizanis & Pizanis [13] (2019); Jahangiri et al [15] (2012); Jiang et al [16] (2018); Busari et al [20] (2002); Stark [35] (2003); Elahi, Alhani and Ahmadi [42] (2012); Wolf et al [31] (2004); McMillan [43] (2007); Martens et al [32] (2009) |
| - Experience, knowledge and expertise | Hsu [5] (2006); Pettit et al [7] (2015); Niederriter, Eyth & Thoman [8] (2017); Abazari & Namnabati [11] (2017); Jahangiri et al [15] (2012); Jiang et al [16] (2018); Busari et al [20] (2002); Seabrook [24] (2003); Esmaeili et al [25] (2014); Kisiel, Bundrick & Beckman [30] (2009); Wolf et al [31] (2004); Martens et al [32] (2009); Schönwetter et al [33] (2006); Elahi, Alhani and Ahmadi [42] (2012); McMillan [43] (2007) |
| - Clinical competency | Goertzen, Stewart & Weston [17] (1995); Elahi, Alhani and Ahmadi [42] (2012) |
| - Effective communication skills | Pizanis & Pizanis [13] (2019); Wolf et al [31] (2004); Martens et al [32] (2009); Najafi kolyaee et al [34] (2011); Elahi, Alhani and Ahmadi [42] (2012); McMillan [43] (2007) |
| - Knowledge and skill in information technology | Jiang et al [16] (2018) |
| - Constructive and timely teacher feedback | van der Hem-Stokroos et al [2] (2003); Adam et al [4] (2019); Hsu [5] (2006); Kneebone et al [6] (2002); Pizanis & Pizanis [13] (2019); Subramanian et al [14] (2012); Jahangiri et al [15] (2012); Goertzen, Stewart & Weston [17] (1995); Busari et al [20] (2002); Knight & Bligh [28] (2006); Kisiel, Bundrick & Beckman [30] (2009); Martens et al [32] (2009); Schönwetter et al [33] (2006); Najafi kolyaee et al [34] (2011); Smith & Kohlwes [37] (2011); Kilcullen [39] (2007); Elahi, Alhani and Ahmadi [42] (2012); McMillan [43] (2007); Bandiera, Lee & Tiberius [45] (2005) |
| - Good and fair assessment skills | Pizanis & Pizanis [13] (2019); Esmaeili et al [25] (2014); Schönwetter et al [33] (2006); Kilcullen [39] (2007); Elahi, Alhani and Ahmadi [42] (2012) |
| - Reflection on teaching and development | Adam et al [4] (2019); Pizanis & Pizanis [13] (2019); Jiang et al [16] (2018); Pinsky & Irby [21] (1997); Knight & Bligh [28] (2006); Johnson-Farmer & Frenn [36] (2009); Gusic, Hageman & Zenni [27] (2013) |

**Supplemental 3. Continued**

| **Dimensions** | **Category (Factors)** | **Subcategories** | **References** |
| --- | --- | --- | --- |
| **Behavioral or content** | Teacher/ educator | - Recognize and attitude towards the learner | Alavi & Abedi [19] (2006); Pinsky & Irby [21] (1997); Kisiel, Bundrick & Beckman [30] (2009); Martens et al [32] (2009); Schönwetter et al [33] (2006); Smith & Kohlwes [37] (2011); Bandiera, Lee & Tiberius [45] (2005) |
| - Positive personality characteristics of the teacher (passion, flexibility, open to criticism, motivation, patience, happiness, kindness, humor, humility) | Pettit et al [7] (2015); Pizanis & Pizanis [13] (2019); Jahangiri et al [15] (2012); Alavi & Abedi [19] (2006); Busari et al [20] (2002); Pinsky & Irby [21] (1997); Seabrook [24] (2003); Esmaeili et al [25] (2014); Gusic, Hageman & Zenni [27] (2013); Knight & Bligh [28] (2006); Kisiel, Bundrick & Beckman [30] (2009); Wolf et al [31] (2004); Martens et al [32] (2009); Schönwetter et al [33] (2006); Najafi kolyaee et al [34] (2011); Stark [35] (2003); Johnson-Farmer & Frenn [36] (2009); Smith & Kohlwes [37] (2011); Arkan, Ordin & Yılmaz [41] (2018); Bandiera, Lee & Tiberius [45] (2005) |
| - Learner support and mentoring | Cuncic et al [3] (2018); Papp, Markkanen & Bonsdorff [9] (2002); McSharry & Lathlean [10] (2017); Schönwetter et al [33] (2006); Houchens et al [38] (2017); Kilcullen [39] (2007); Bandiera, Lee & Tiberius [45] (2005); Knight & Bligh [28] (2006); Arkan, Ordin & Yılmaz [41] (2018); McMillan [43] (2007) |
| - Role modeling | Price & Mitchell [1] (1993); Niederriter, Eyth & Thoman [8] (2017); Jiang et al [16] (2018); Kisiel, Bundrick & Beckman [30] (2009); Wolf et al [31] (2004); Stark [35] (2003); Johnson-Farmer & Frenn [36] (2009); Smith & Kohlwes [37] (2011); Kilcullen [39] (2007); Bandiera, Lee & Tiberius [45] (2005) |
| - Role transparency, responsibility and accountability of the teacher | Abazari & Namnabati [11] (2017); Pizanis & Pizanis [13] (2019); Morris [18] (2007); Seabrook [24] (2003); Esmaeili et al [25] (2014) |
| - Rapport with the student and patient | Cuncic et al [3] (2018); Pizanis & Pizanis [13] (2019); Esmaeili et al [25] (2014); Schönwetter et al [33] (2006); Najafi kolyaee et al [34] (2011); Houchens et al [38] (2017) |
| - Professionalism (commitment, empathy, care, cultural sensitivity) | Jiang et al [16] (2018); Price & Mitchell [1] (1993); Adam et al [4] (2019); Hsu [5] (2006); Papp, Markkanen & Bonsdorff [9] (2002); Pizanis & Pizanis [13] (2019); Jahangiri et al [15] (2012); Goertzen, Stewart & Weston [17] (1995); Busari et al [20] (2002); Seabrook [24] (2003); Knight & Bligh [28] (2006); Wolf et al [31] (2004); Najafi kolyaee et al [34] (2011); Smith & Kohlwes [37] (2011); Houchens et al [38] (2017) |

**Supplemental 3. Continued**

| **Dimensions** | **Category (Factors)** | **Subcategories** | **References** |
| --- | --- | --- | --- |
| **Behavioral or content** | The patient and her/his behaviors | - Patient issues and problems and its educational value | AlHaqwi et al [12] (2010) |
| - Role transparency and patient responsibility | Abazari & Namnabati [11] (2017) |
| - Patient-centered in clinical teaching and her/his educational involvement | Pizanis & Pizanis [13] (2019); Jahangiri et al [15] (2012); Schönwetter et al [33] (2006); Smith & Kohlwes [37] (2011); Houchens et al [38] (2017) |
| - Individual characteristics of patients and their families | Arkan, Ordin & Yılmaz [41] (2018) |
| **Social** | Collaborative Learning Community(in clinical practice) | - Student-instructor-patient interaction and sharing clinical experiences | Price & Mitchell [1] (1993); Adam et al [4] (2019); Jahangiri et al [15] (2012); Morris [18] (2007); Alavi & Abedi [19] (2006); Smith, Cotton & O'Neill [23] (2009); Esmaeili et al [25] (2014); Ranse & Grealish [26] (2007); Gusic, Hageman & Zenni [27] (2013); Ruth-Sahd [29] (2011), Kisiel, Bundrick & Beckman [30] (2009); Schönwetter et al [33] (2006); Johnson-Farmer & Frenn [36] (2009); Bandiera, Lee & Tiberius [45] (2005) |
| - An empowering student-teacher learning relationship (Continuity) | McSharry & Lathlean [10] (2017); Niederriter, Eyth & Thoman [8] (2017); Goertzen, Stewart & Weston [17] (1995); Ruth-Sahd [29] (2011), Smith & Kohlwes [37] (2011); Esmaeili et al [25] (2014); Najafi kolyaee et al [34] (2011) |
| - Multidisciplinary team-interactive approach in clinical teaching and care | Abazari & Namnabati [11] (2017); Jiang et al [16] (2018); Houchens et al [38] (2017); Subramanian & Thomson [40] (2017); Thomson et al [44] (2014) |
| - Interactive and Socratic dialogue based on practice | McSharry & Lathlean [10] (2017); Alavi & Abedi [19] (2006); Wolf et al [31] (2004); Schönwetter et al [33] (2006); Johnson-Farmer & Frenn [36] (2009); Houchens et al [38] (2017); McMillan [43] (2007) |
| - Collaborative and group learning | Subramanian et al [14] (2012); Phuma-Ngaiyaye, Bvumbwe & Chipeta [22] (2017); Ranse & Grealish [26] (2007); Houchens et al [38] (2017) |

**Supplemental 3. Continued**

| **Dimensions** | **Category (Factors)** | **Subcategories** | **References** |
| --- | --- | --- | --- |
| **Pedagogical** | Instructional design and teaching-learning opportunities | - Setting clinical learning goals | Cuncic et al [3] (2018); Hsu [5] (2006); Goertzen, Stewart & Weston [17] (1995); Pinsky & Irby [21] (1997); Smith, Cotton & O'Neill [23] (2009); Seabrook [24] (2003); Schönwetter et al [33] (2006); Johnson-Farmer & Frenn [36] (2009); Kilcullen [39] (2007); McMillan [43] (2007) |
| - Pre-planning and the logical structure of teaching sessions | Price & Mitchell [1] (1993); AlHaqwi et al [12] (2010); Goertzen, Stewart & Weston [17] (1995); Morris [18] (2007); Smith, Cotton & O'Neill [23] (2009); Seabrook [24] (2003); Martens et al [32] (2009); Schönwetter et al [33] (2006); Najafi kolyaee et al [34] (2011); Smith & Kohlwes [37] (2011); Bandiera, Lee & Tiberius [45] (2005); Pinsky & Irby [21] (1997); Subramanian & Thomson [40] (2017) |
| - Learner- centered | Cuncic et al [3] (2018); Hsu [5] (2006); Ranse & Grealish [26] (2007); Najafi kolyaee et al [34] (2011); Johnson-Farmer & Frenn [36] (2009); Smith & Kohlwes [37] (2011); Houchens et al [38] (2017); Kilcullen [39] (2007); Bandiera, Lee & Tiberius [45] (2005) |
| - Scaffolding | McSharry & Lathlean [10] (2017); McMillan [43] (2007) |
| - Facilitating learning through assessment (assessment for learning and assessment as learning) | Najafi kolyaee et al [34] (2011); Smith & Kohlwes [37] (2011); Kilcullen [39] (2007); Elahi, Alhani and Ahmadi [42] (2012) |
| - Content and its relevance to the learner's needs | Pettit et al [7] (2015) |
| - The planning and provision of diverse and authentic clinical learning experiences | Kneebone et al [6] (2002); Hsu [5] (2006); AlHaqwi et al [12] (2010); Morris [18] (2007); Smith, Cotton & O'Neill [23] (2009); Wolf et al [31] (2004); Schönwetter et al [33] (2006); Najafi kolyaee et al [34] (2011); Houchens et al [38] (2017); Subramanian & Thomson [40] (2017) |
| - Teaching priorities | Hsu [5] (2006); Seabrook [24] (2003); Smith & Kohlwes (2011) |
| - Context/situation-based teaching | Pizanis & Pizanis [13] (2019); Smith & Kohlwes [37] (2011); Subramanian & Thomson [40] (2017); Pinsky & Irby [21] (1997) |

**Supplemental 3. Continued**

| **Dimensions** | **Category (Factors)** | **Subcategories** | **References** |
| --- | --- | --- | --- |
| **Context/ contextual** | Positive and supportive clinical environment | - Non-threatening and stress-free teaching-learning physical environment and atmosphere | Price & Mitchell [1] (1993); van der Hem-Stokroos et al [2] (2003); Pettit et al [7] (2015); Abazari & Namnabati [11] (2017); Alavi & Abedi [19] (2006); Phuma-Ngaiyaye, Bvumbwe & Chipeta [22] (2017); Ranse & Grealish [26] (2007); Wolf et al [31] (2004); Schönwetter et al [33] (2006); Stark [35] (2003); Smith & Kohlwes [37] (2011); Houchens et al [38] (2017); Thomson et al [44] (2014); Bandiera, Lee & Tiberius [45] (2005) |
| - Psycho-social climate of teaching / learning | Abazari & Namnabati [11] (2017); Busari et al [20] (2002); Arkan, Ordin & Yılmaz [41] (2018) |
| - Strong teaching culture in clinical environment | Seabrook [24] (2003); Arkan, Ordin & Yılmaz [41] (2018); Thomson et al [44] (2014) |
| - Supportive learning environment | Jiang et al [16] (2018); Wolf et al [31] (2004); Schönwetter et al [33] (2006); Johnson-Farmer & Frenn [36] (2009); Houchens et al [38] (2017) |
| - Teacher presence and availability | Pizanis & Pizanis [13] (2019); Jahangiri et al [15] (2012); Esmaeili et al [25] (2014); Wolf et al [31] (2004); McMillan [43] (2007); Bandiera, Lee & Tiberius [45] (2005) |
| - Educational facilities and equipment | Alavi & Abedi [19] (2006); Seabrook [24] (2003); Najafi kolyaee et al [34] (2011); Johnson-Farmer & Frenn [36] (2009); Arkan, Ordin & Yılmaz [41] (2018) |

**Supplemental 3. Continued**

| **Dimensions** | **Category (Factors)** | **Subcategories** | **References** |
| --- | --- | --- | --- |
| **Educational leadership** | Classroom management and structure | - Good supervision in clinical teaching-learning | AlHaqwi et al [12] (2010) |
| - Punctual and time management | Pizanis & Pizanis [13] (2019); Seabrook [24] (2003); Martens et al [32] (2009); Schönwetter et al [33] (2006); Smith & Kohlwes [37] (2011) |
| - Balance between roles, responsibilities and clinical work and teaching | Goertzen, Stewart & Weston [17] (1995); Smith & Kohlwes [37] (2011) |
| - Encouraging team members to perform tasks | Houchens et al [38] (2017) |
| - Classroom management | Elahi, Alhani and Ahmadi [42] (2012) |
| - Administrative support | Thomson et al [44] (2014) |

**References**

1. Price, David A., and C. A. Mitchell. "A model for clinical teaching and learning." *Medical Education* 27, no. 1 (1993): 62-68. <https://doi.org/10.1111/j.1365-2923.1993.tb00230.x>

2. Van der Hem-Stokroos, H. H., H. E. M. Daelmans, C. P. M. Van der Vleuten, HJ TH M. Haarman, and A. J. J. A. Scherpbier. "A qualitative study of constructive clinical learning experiences." *Medical teacher* 25, no. 2 (2003): 120-126. <https://doi.org/10.1080/0142159031000092481>

3. Cuncic, Cary, Glenn Regehr, Heather Frost, and Joanna Bates. "It’s all about relationships." *Perspectives on medical education* 7, no. 2 (2018): 100-109. <https://doi.org/10.1007/s40037-018-0416-y>

4. Adam, Lee A., Jo Oranje, Alison M. Rich, and Alison Meldrum. "Advancing dental education: feedback processes in the clinical learning environment." *Journal of the Royal Society of New Zealand* 50, no. 1 (2020): 144-157. <https://doi.org/10.1080/03036758.2019.1656650>

5. Hsu, Li‐Ling. "An analysis of clinical teacher behaviour in a nursing practicum in Taiwan." *Journal of clinical nursing* 15, no. 5 (2006): 619-628. <https://doi.org/10.1111/j.1365-2702.2006.01332.x>

6. Kneebone, Roger, Jane Kidd, Debra Nestel, Suzanne Asvall, Paraskevas Paraskeva, and Ara Darzi. "An innovative model for teaching and learning clinical procedures." *Medical education* 36, no. 7 (2002): 628-634. <https://doi.org/10.1046/j.1365-2923.2002.01261.x>

7. Pettit, Jeffrey E., Rick D. Axelson, Kristi J. Ferguson, and Marcy E. Rosenbaum. "Assessing effective teaching: what medical students value when developing evaluation instruments." *Academic Medicine* 90, no. 1 (2015): 94-99.

8. Niederriter, Joan E., David Eyth, and Joan Thoman. "Nursing students’ perceptions on characteristics of an effective clinical instructor." *SAGE Open Nursing* 3 (2017): 2377960816685571. <https://doi.org/10.1177/2377960816685571>

9. Papp, Inkeri, Marjatta Markkanen, and Mikaela von Bonsdorff. "Clinical environment as a learning environment: student nurses’ perceptions concerning clinical learning experiences." *Nurse education today* 23, no. 4 (2003): 262-268. <https://doi.org/10.1016/S0260-6917(02)00185-5>

10. McSharry, Edel, and Judith Lathlean. "Clinical teaching and learning within a preceptorship model in an acute care hospital in Ireland; a qualitative study." *Nurse Education Today* 51 (2017): 73-80. <https://doi.org/10.1016/j.nedt.2017.01.007>

11. Abazari, Parvaneh, and Mahboobeh Namnabati. "Restrictive and Facilitating Factors of Nursing StudentsClinical Education Effectiveness." *Iranian Journal of Medical Education* 17 (2017): 494-503. <http://ijme.mui.ac.ir/article-1-4628-fa.html>

12. AlHaqwi, A. I., van der Molen, H. T., Schmidt, H. G., & Magzoub, M. E. (2010). Determinants of effective clinical learning: a student and teacher perspective in Saudi Arabia. *Education for Health*, *23*(2), 369. <https://www.proquest.com/docview/2258181119/fulltextPDF/44E7D4B142A64069PQ/1?accountid=34199>

13. Pizanis, Vicki G., and Charles Pizanis. "Effective and ineffective clinical teaching in dental hygiene education: a qualitative study." *Journal of dental education* 83, no. 8 (2019): 904-913. <https://doi.org/10.21815/JDE.019.087>

14. Subramanian, J., V. R. Anderson, K. C. Morgaine, and W. M. Thomson. "Improving the quality of educational strategies in postgraduate dental education using student and graduate feedback: findings from a qualitative study in N ew Z ealand." *European Journal of Dental Education* 17, no. 1 (2013): e151-e158. <https://doi.org/10.1111/eje.12006>

15. Jahangiri, L., M. McAndrew, A. Muzaffar, and T. W. Mucciolo. "Characteristics of effective clinical teachers identified by dental students: a qualitative study." *European Journal of Dental Education* 17, no. 1 (2013): 10-18. <https://doi.org/10.1111/eje.12012>

16. Jiang, Jinxia, Li Zeng, Jennifer Kue, Hong Li, Yan Shi, and Cuiping Chen. "Effective teaching behaviors in the emergency department: A qualitative study with Millennial nursing students in Shanghai." *Nurse education today* 61 (2018): 220-224. <https://doi.org/10.1016/j.nedt.2017.12.007>

17. Goertzen, James, Moira Stewart, and Wayne Weston. "Effective teaching behaviours of rural family medicine preceptors." *CMAJ: Canadian Medical Association Journal* 153, no. 2 (1995): 161. <https://www.ncbi.nlm.nih.gov/pmc/articles/PMC1338054/pdf/cmaj00074-0035.pdfb>

18. Morris, Jenny. "Factors influencing the quality of student learning on practice placements." *Learning in Health and Social Care* 6, no. 4 (2007): 213-219. <https://doi.org/10.1111/j.1473-6861.2007.00161.x>

19. Alavi, M., and H. Abedi. "Nursing students experiences from effective clinical education." (2006): 127-133. <http://jsums.medsab.ac.ir/article_194_c5173e82f358390c757920d76596db89.pdf>

20. Busari, Jamiu O., Katinka JAH Prince, Albert JJA Scherpbier, Cees PM van der Vleuten, and Gerard GM Essed. "How residents perceive their teaching role in the clinical setting: a qualitative study." *Medical Teacher* 24, no. 1 (2002): 57-61. <https://doi.org/10.1080/00034980120103496>

21. Pinsky, Linda E., and David M. Irby. "" If at first you don't succeed": using failure to improve teaching." *Academic medicine: journal of the Association of American Medical Colleges* 72, no. 11 (1997): 973-6. <https://doi.org/10.1097/00001888-199711000-00013>

22. Phuma-Ngaiyaye, Ellemes, Thokozani Bvumbwe, and Mep Coretta Chipeta. "Using preceptors to improve nursing students' clinical learning outcomes: a Malawian students' perspective." *International journal of nursing sciences* 4, no. 2 (2017): 164-168. <https://doi.org/10.1016/j.ijnss.2017.03.001>

23. Smith, Pat, Phil Cotton, and Anna O’Neill. "‘Can you take a student this morning?’Maximising effective teaching by practice nurses." *Medical education* 43, no. 5 (2009): 426-433. <https://doi.org/10.1111/j.1365-2923.2009.03308.x>

24. Seabrook, M. A. "Medical teachers' concerns about the clinical teaching context." *Medical education* 37, no. 3 (2003): 213-222. <https://doi.org/10.1046/j.1365-2923.2003.01437.x>

25. Esmaeili, Maryam, Mohammad Ali Cheraghi, Mahvash Salsali, and Shahrzad Ghiyasvandian. "Nursing students' expectations regarding effective clinical education: a qualitative study." *International Journal of Nursing Practice* 20, no. 5 (2014): 460-467. <https://doi.org/10.1111/ijn.12159>

26. Ranse, Kristen, and Laurie Grealish. "Nursing students’ perceptions of learning in the clinical setting of the Dedicated Education Unit." *Journal of Advanced nursing* 58, no. 2 (2007): 171-179. <https://doi.org/10.1111/j.1365-2648.2007.04220.x>

27. Gusic, Maryellen, Heather Hageman, and Elisa Zenni. "Peer review: a tool to enhance clinical teaching." *The clinical teacher* 10, no. 5 (2013): 287-290. <https://doi.org/10.1111/tct.12039>

28. Knight, Lynn V., and John Bligh. "Physicians’ perceptions of clinical teaching: A qualitative analysis in the context of change." *Advances in health sciences education* 11, no. 3 (2006): 221-234. <https://doi.org/10.1007/s10459-005-4035-0>

29. Ruth‐Sahd, Lisa A. "Student nurse dyads create a community of learning: proposing a holistic clinical education theory." *Journal of Advanced Nursing* 67, no. 11 (2011): 2445-2454. <https://doi.org/10.1111/j.1365-2648.2011.05690.x>

30. Kisiel, John B., John B. Bundrick, and Thomas J. Beckman. "Resident physicians’ perspectives on effective outpatient teaching: a qualitative study." *Advances in health sciences education* 15, no. 3 (2010): 357-368. <https://doi.org/10.1007/s10459-009-9202-2>

31. Wolf, Zane Robinson, Pamela J. Bender, Janice M. Beitz, Diane M. Wieland, and Kathleen O. Vito. "Strengths and weaknesses of faculty teaching performance reported by undergraduate and graduate nursing students: A descriptive study." *Journal of Professional Nursing* 20, no. 2 (2004): 118-128. <https://doi.org/10.1016/j.profnurs.2004.03.003>

32. Martens, Merel JC, Robbert J. Duvivier, Jan Van Dalen, G. Maarten Verwijnen, Albert JJA Scherpbier, and Cees PM Van Der Vleuten. "Student views on the effective teaching of physical examination skills: a qualitative study." *Medical Education* 43, no. 2 (2009): 184-191. <https://doi.org/10.1111/j.1365-2923.2008.03283.x>

33. Schönwetter, Dieter J., Salme Lavigne, Randy Mazurat, and Orla Nazarko. "Students’ perceptions of effective classroom and clinical teaching in dental and dental hygiene education." *Journal of Dental Education* 70, no. 6 (2006): 624-635. <https://doi.org/10.1002/j.0022-0337.2006.70.6.tb04118.x>

34. Najafi, Kolyaee, M. Sharif, Farkhondeh. Jamshidi, Nahid . and Karimi, Shahnaz. "Students' perceptions of effective teaching in nursing education: A qualitative study." no. 6, vol. 19 (2011): 6-15. <http://ijnr.ir/article-1-776-fa.html>

35. Stark, Patsy. "Teaching and learning in the clinical setting: a qualitative study of the perceptions of students and teachers." *Medical Education* 37, no. 11 (2003): 975-982. <https://doi.org/10.1046/j.1365-2923.2003.01675.x>

36. Johnson-Farmer, Barbara, and Marilyn Frenn. "Teaching excellence: what great teachers teach us." *Journal of Professional Nursing* 25, no. 5 (2009): 267-272. <https://doi.org/10.1016/j.profnurs.2009.01.020>

37. Smith, Dustin T., and R. Jeffrey Kohlwes. "Teaching strategies used by internal medicine residents on the wards." *Medical teacher* 33, no. 12 (2011): e697-e703. <https://www.tandfonline.com/doi/full/10.3109/0142159X.2011.611838>

38. Houchens, Nathan, Molly Harrod, Stephanie Moody, Karen E. Fowler, and Sanjay Saint. "Techniques and behaviors associated with exemplary inpatient general medicine teaching: an exploratory qualitative study." *Journal of hospital medicine* 12, no. 7 (2017): 503-509. <https://doi.org/10.12788/jhm.2763>

39. Kilcullen, Nora M. "Said another way: the impact of mentorship on clinical learning." In *Nursing forum*, vol. 42, no. 2, pp. 95-104. Malden, USA: Blackwell Publishing Inc, 2007. <https://doi.org/10.1111/j.1744-6198.2007.00073.x>

40. Subramanian, J., and W. M. Thomson. "The learning environment in professional doctorate and postgraduate dental education: a qualitative study." *European Journal of Dental Education* 21, no. 4 (2017): 261-271. <https://doi.org/10.1111/eje.12209>

41. Arkan, Burcu, Yaprak Ordin, and Dilek Yılmaz. "Undergraduate nursing students' experience related to their clinical learning environment and factors affecting to their clinical learning process." *Nurse education in practice* 29 (2018): 127-132. <https://doi.org/10.1016/j.nepr.2017.12.005>

42. Elahi, Nasrin, Fatemeh Alhani, and Fazlolah Ahmadi. "Effective education: perceptions and experiences of nursing students." (2012): 110-119. <http://ijme.mui.ac.ir/article-1-1743-fa.html>

43. McMillan, Wendy Jayne. "“Then you get a teacher”—Guidelines for excellence in teaching." *Medical Teacher* 29, no. 8 (2007): e209-e218. <https://www.tandfonline.com/doi/pdf/10.1080/01421590701478264?needAccess=true>

44. Thomson, Jennifer S., Katrina Anderson, Emily Haesler, Amanda Barnard, and Nicholas Glasgow. "The learner’s perspective in GP teaching practices with multi-level learners: a qualitative study." *BMC medical education* 14, no. 1 (2014): 1-10. <https://doi.org/10.1186/1472-6920-14-55>

45. Bandiera, Glen, Shirley Lee, and Richard Tiberius. "Creating effective learning in today's emergency departments: how accomplished teachers get it done." *Annals of emergency medicine* 45, no. 3 (2005): 253-261. <https://doi.org/10.1016/j.annemergmed.2004.08.007>
